# Supplementary material for: Investigation of photoinduced electron transfer on TiO2 nanowire arrays/porphyrin composite via scanning electrochemical microscopy
Source: Royal Society of Chemistry journal article supplement (doi:10.1039/c5ra08485g), 2015-01-01
Supplement: c5ra08485g1.pdf [file c5ra08485g1.pdf]

# **Investigation of Photoinduced Electron Transfer on TiO<sub>2</sub> Nanowires Arrays/Porphyrin Composite via Scanning Electrochemical Microscope**

Yuan Jiang, Dong-Dong Qin, Yan-Ru Fan, Hui-Xia Guo, Shi-Xia Wang, Jing-Xuan

Zhang, Xiao-Quan, Lu\*

Key Laboratory of Bioelectrochemistry & Environmental Analysis of Gansu Province, College of  
Chemistry & Chemical Engineering, Northwest Normal University, Lanzhou 730070, P. R. China

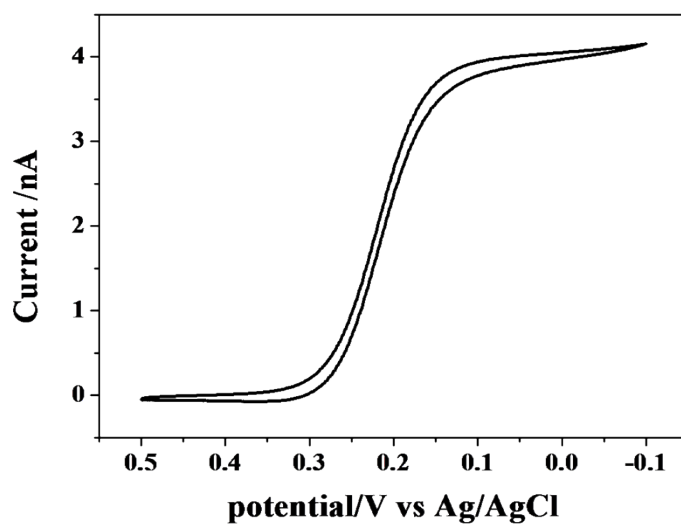

**Figure S1** Typical cyclic voltammogram of the UME in 1 mM  $\text{Fe}(\text{CN})_6^{3-/4-}$  containing 0.1 M KCl.

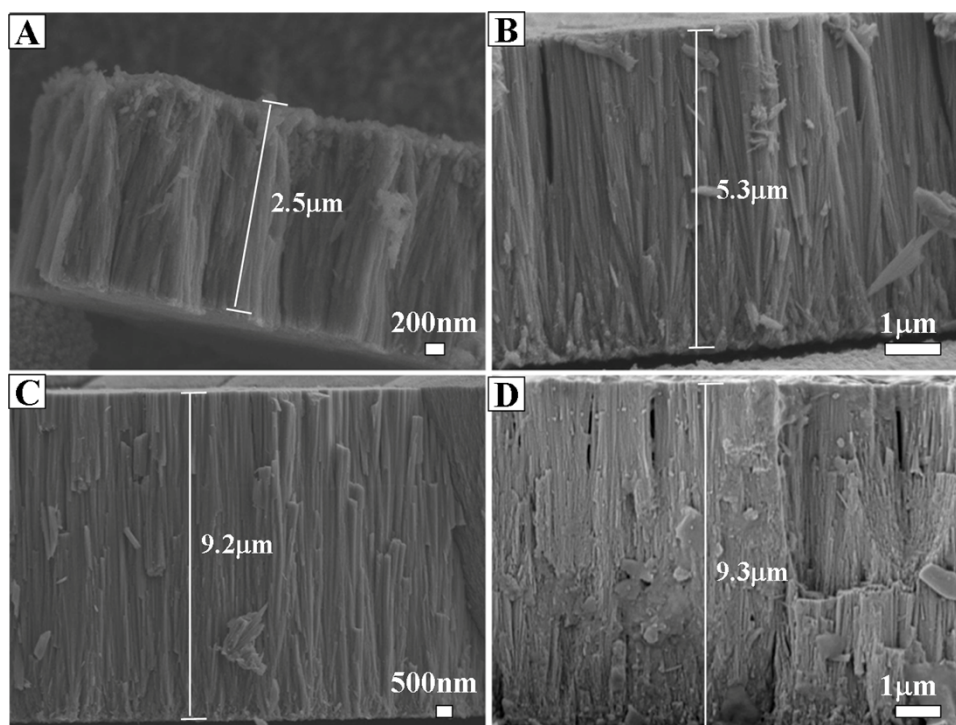

**Figure S2** SEM images of FTO/TiO<sub>2</sub> electrodes grown from a two-step or three-step hydrothermal reaction for : (A) 4 h ; (B) 6 h ; (C) 9 h ; (D) 9 h.

**Table S1** Determination of the EIS of each sample tested.

| Sample | $R_s(\text{ohm})$ | $R_{\text{SEI}}(10^3\text{ohm})$ | $R_{\text{ct}}(10^3\text{ohm})$ |
|--------|-------------------|----------------------------------|---------------------------------|
| S1     | 192.1             | 24.76                            | 23.19                           |
| S2     | 186.4             | 8.99                             | 1.582                           |
| S3     | 190.8             | 8.88                             | 1.124                           |
| S4     | 187.9             | 7.12                             | 1.062                           |
| S5     | 185.5             | 5.97                             | 0.894                           |
| S6     | 182.8             | 3.58                             | 0.626                           |
